# Supplementary material
Source: PubMed Central journal article supplement (PMC3035164)

## **SUMMARY OF SUPPLEMENTAL FIGURES**

### **Supplemental Figure I**

Characteristics of the physiological and pathological cardiac hypertrophy mice model (swimming and TAC). Additional immunohistochemistry of proliferation markers including z-stack orthogonal views.

### **Supplemental Figure II**

Preliminary follow up data on eight transcription factors identified using the Quanttrx screen

### **Supplemental Figure III**

C/EBP $\beta$  siRNA and adenoviral over expression data in vitro. ANP/BNP levels and target gene expression with C/EBP $\beta$  over expression.

### **Supplemental Figure IV**

AKT over expression in vitro and its effect on C/EBP $\beta$  and target genes. Expression levels of exercise-induced genes after TAC surgery. PGC1 $\alpha$  over expression and cell sizes.

### **Supplemental Figure V**

CITED4 gain- and loss of function characteristics in vitro and proliferation target gene expression.

### **Supplemental Figure VI**

Characteristics of the C/EBP $\beta$  heterozygous mouse including cardiac C/EBP $\beta$  levels, target gene expression, heart weight, exercise capacity and proliferation markers.

### **Supplemental Figure VII**

Ultrasound data from C/EBP $\beta$ <sup>+/-</sup> and control mice subjected to TAC. Heart weight and C/EBP $\beta$  levels of exercised C/EBP $\beta$ <sup>+/-</sup> mice.

### **Supplemental Table I**

Genes altered in the Quanttrx screen from exercised mice

### **Supplemental Table II**

Genes altered in the Quanttrx screen from mice subjected to TAC

### **Supplemental Table III**

Baseline echocardiatic parameters of C/EBP $\beta$ <sup>+/-</sup> mice at baseline.

### **Supplemental Table IV**

List of primers used

## LEGENDS TO SUPPLEMENTAL FIGURES

### Supplemental figure I

**A-D.** Data from exercised and TAC-operated mice with respective controls (n=4). **A.** Heart weights normalized to body weights (multiplied by 1000). **B.** Left Ventricular Posterior Wall in diastole (LWPWd) + Left Ventricular Septum in diastole (LVSD). Data presented as mm. **C.** Cell size measurement of cardiomyocytes after cardiac WGA staining in indicated groups. More than 100 cells from each group (n=4) was measured. **D.** mRNA levels of ANP and BNP normalized to 18s levels in indicated groups. **E.** Quantification of CD31 positive cell area relative to total tissue area from exercised and control mice. **F.** Quantification of cells positive with staining using an anti-fibroblast antibody (abcam) in exercised and control mice. **G.** Confocal images of Phospho-histone3 staining (green) counterstained with dapi (blue) and  $\alpha$ -actinin (green) in cardiac tissue from exercised mice. Upper left: Cardiomyocyte in prophase with nuclear condensation. Upper right: Cardiomyocyte at end of prophase. Lower left: Cardiomyocyte undergoing cariokinesis and lower right: Cardiomyocyte in telophase after nuclear separation. **H.** Confocal stack of BrdU staining with orthogonal view displaying a nuclei within cardiomyocyte (upper panel) and a nuclei outside cardiomyocyte (lower panel).  
\* indicates  $p < 0.05$  using students t-test.

### Supplemental figure II

**A.** qPCR validation of Quanttrx-identified transcription factors with expression changes in either the physiological or pathological hypertrophy model (n=4). All changes are  $p < 0.05$  using students t-test. **B.** Cardiomyocytes and non-cardiomyocytes separated from rat neonatal hearts using density gradient centrifugation. Samples were analyzed for indicated gene expression normalized to 18S, and cardiomyocytes set to 1. **C.** Adenoviral over expression of

indicated genes in rat neonatal cardiomyocytes followed by size measurements. Data is expressed as percent of GFP control. **D.** Western Blot against C/EBP $\beta$  in cardiomyocytes (CM) and non-cardiomyocytes with actin as loading control. **E.** Correlation between the percent change seen in the exercise model (y-axis) and the TAC-model (x-axis). All Quanttrix transcription factors significantly altered in either model are included. \* indicates  $p < 0.05$  using students t-test

### **Supplemental figure III**

**A.** SiRNA knockdown of C/EBP $\beta$  in primary cardiomyocytes assayed using RT-PCR. Two siRNA constructs and two control siRNA's was used. Data is normalized to respective control and 18S. **B.** Western blot against C/EBP $\beta$  and tubulin from primary cardiomyocytes transfected with control or C/EBP $\beta$  siRNA #2. **C.** mRNA levels of ANP and BNP in rat neonatal cardiomyocytes transfected with control or C/EBP $\beta$  siRNA with or without 24 hours treatment with phenylephrine (PE). **D.** Over expression with C/EBP $\beta$  adenocirus in primary cardiomyocytes followed by western blot analysis against C/EBP $\beta$ . \* indicates  $p < 0.05$  vs respective control and § vs control siRNA +PE using one-way ANOVA.

### **Supplemental figure IV**

**A.** Normalized mRNA levels of indicated genes following C/EBP $\beta$  adenoviral over expression in primary cardiomyocytes. **B-C.** Rat neonatal cardiomyocytes transduced with indicated adenoviral constructs followed by RT-PCR analysis of indicated genes normalized to 18S. **D.** mRNA expression levels of indicated genes from cardiac samples of sham- or TAC operated mice 2 weeks after intervention (n=4). **E.** Rat neonatal cardiomyocytes transduced with PGC1 $\alpha$  or GFP expressing adenovirus followed by size measurements. \* indicates  $p < 0.05$  using students t-test (A, D and E) and § marks  $p < 0.05$  vs AKTwt + GFP using one-way ANOVA (B-C).

### Supplemental figure V

**A.** Pro-proliferative genes up regulated in endurance exercise from expression analysis experiment. **B.** Western blot against CITED4 from rat neonatal cardiomyocytes treated with control or CITED4 expressing adenovirus. **C.** mRNA analysis of CITED4 after transient transfection with control or CITED4 siRNA as annotated. **D.** Normalized SRF mRNA levels with GFP or CITED4 adenoviral over expression. **E-F.** mRNA levels of n-myc and cyclinD1 in heart samples following endurance exercise (**E**) or in rat neonatal cardiomyocytes over expressing CITED4 (**F**). \* indicates  $p < 0.05$  using students t-test

### Supplemental figure VI

**A-B.** C/EBP $\beta$  mRNA (**A**) and protein (**B**) levels in heart from wild type (n=5) and C/EBP $\beta^{+/-}$  (n=7) mice. mRNA levels were normalized to the 18S gene. **C.** Expression of exercise-induced genes in the C/EBP $\beta^{+/-}$  mice compared to wild type littermates (n=5 and 7 respectively). **D.** Heart weights of C/EBP $\beta^{+/-}$  mice compared to wild type littermates (n=4 and 5 respectively) at baseline. **E.** Maximal exercise capacity measured as described in the method section, in wt and C/EBP $\beta^{+/-}$  mice. **F.** PCNA western blot from wt and C/EBP $\beta^{+/-}$  mice with sub sequent quantification. Data is presented as PCNA-background normalized to  $\beta$ -actin. **G.** Quantification of ki67 positive cardiomyocyte nuclei (n=5 and 7 mice based on at least 20 images per mouse). \* indicates  $p < 0.05$  using students t-test

### Supplemental figure VII

**A-B.** Echocardiographic characteristics of wild type and C/EBP $\beta^{+/-}$  mice after TAC intervention (day 0). **A.** diastolic (left) and systolic (right) Left intraventricular diameter (LVD). **B.** the sum of either diastolic (left) or systolic (right) Intraventricular (IV) and Left Ventricular Posterior Wall (LVPW) width. **C.** Heart weight in wild type and C/EBP $\beta^{+/-}$  mice after TAC intervention. **D.** C/EBP $\beta$  expression levels in C/EBP $\beta^{+/-}$  and wild type mice after

the endurance exercise protocol. **E.** Heart weights normalized to body weight in C/EBP $\beta$ <sup>+/-</sup> and wild type mice after the endurance exercise protocol. \* indicates p<0.05 using students t-test.

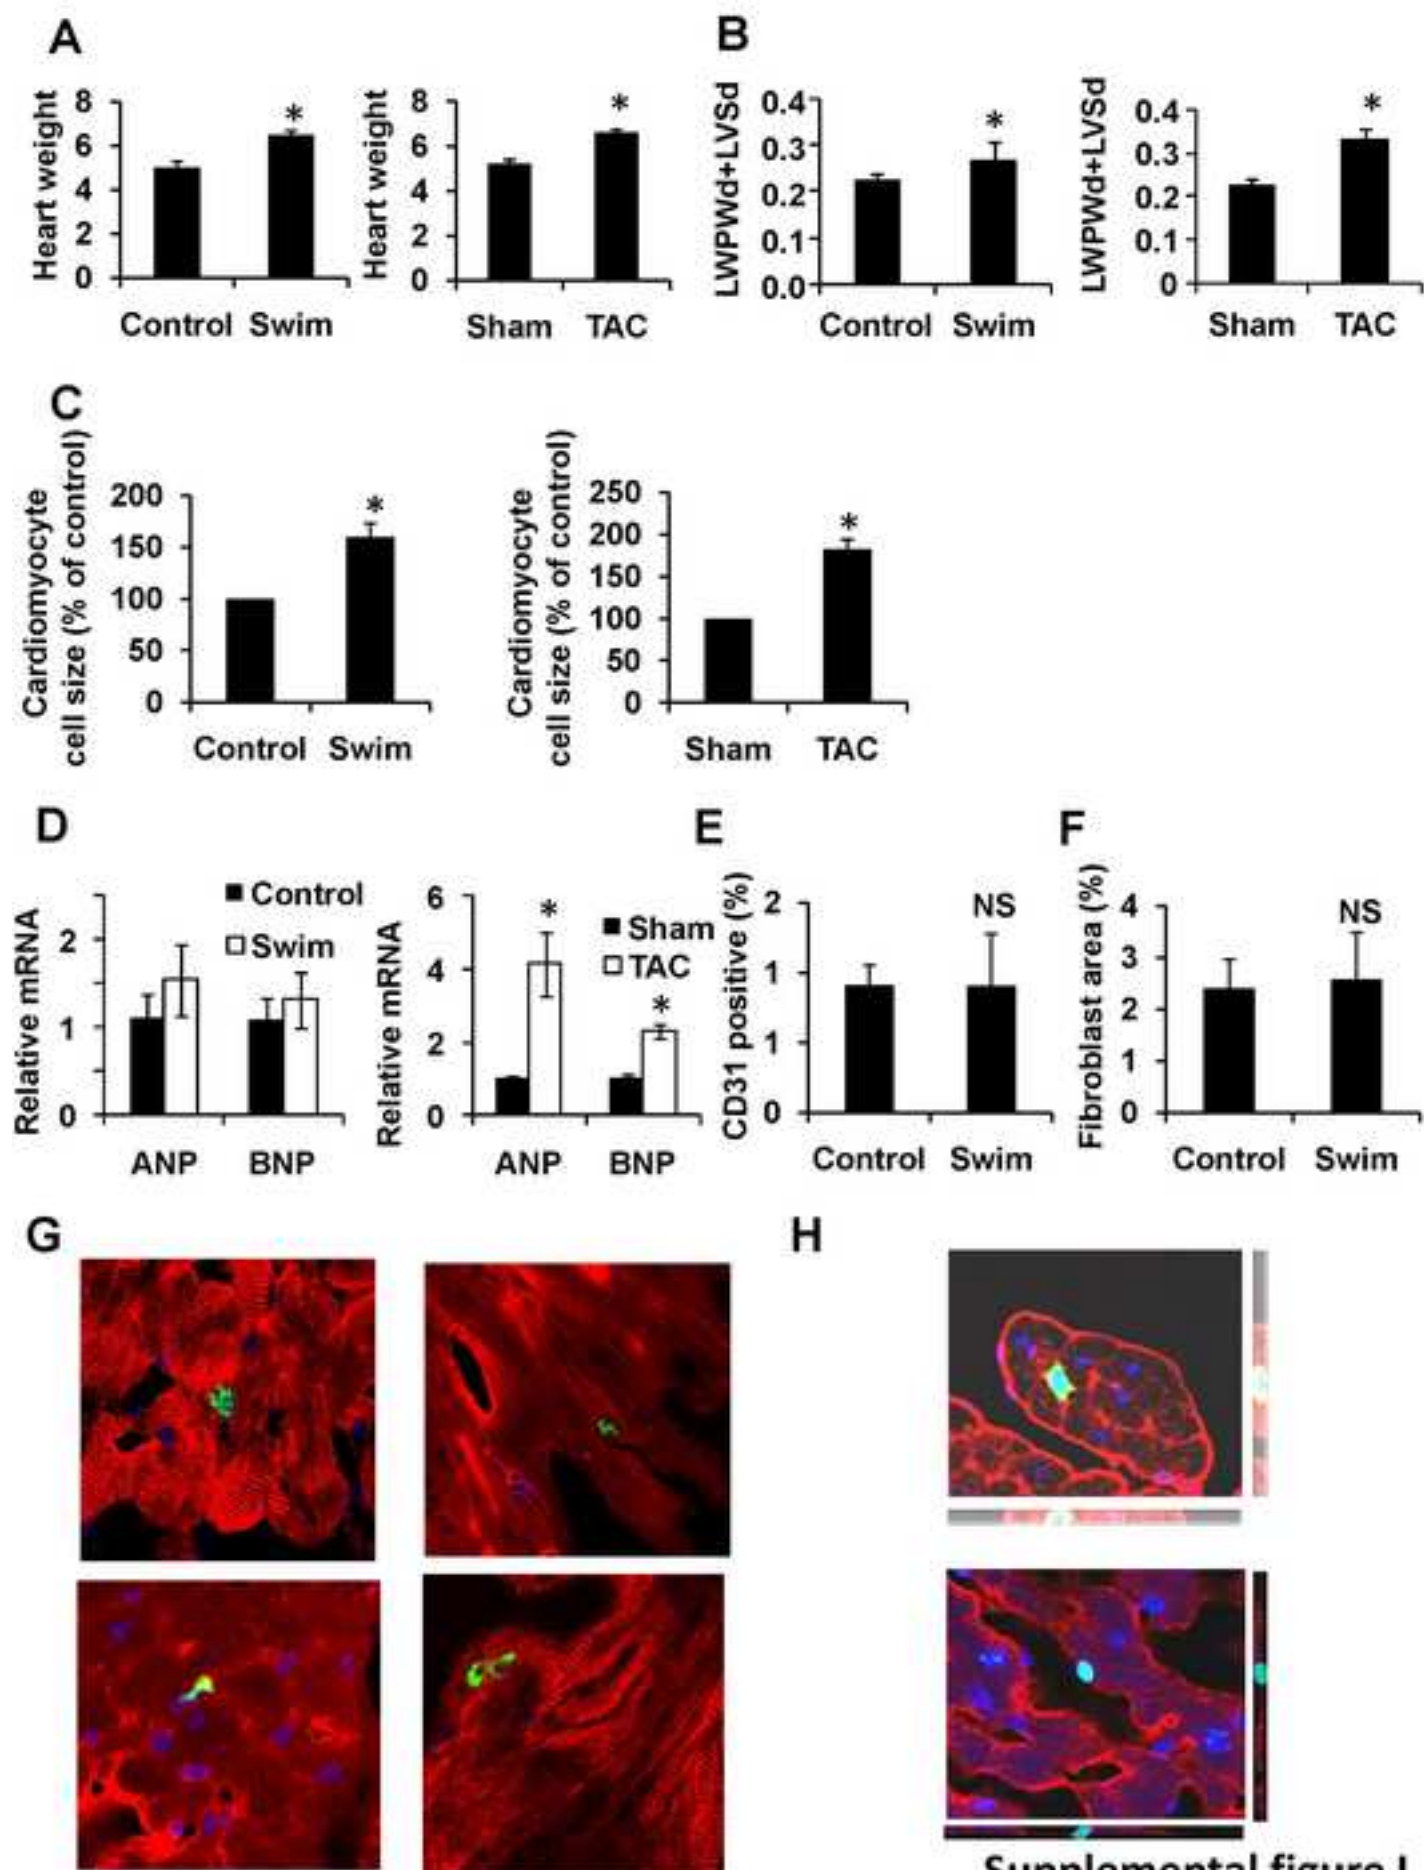

Supplemental figure 1

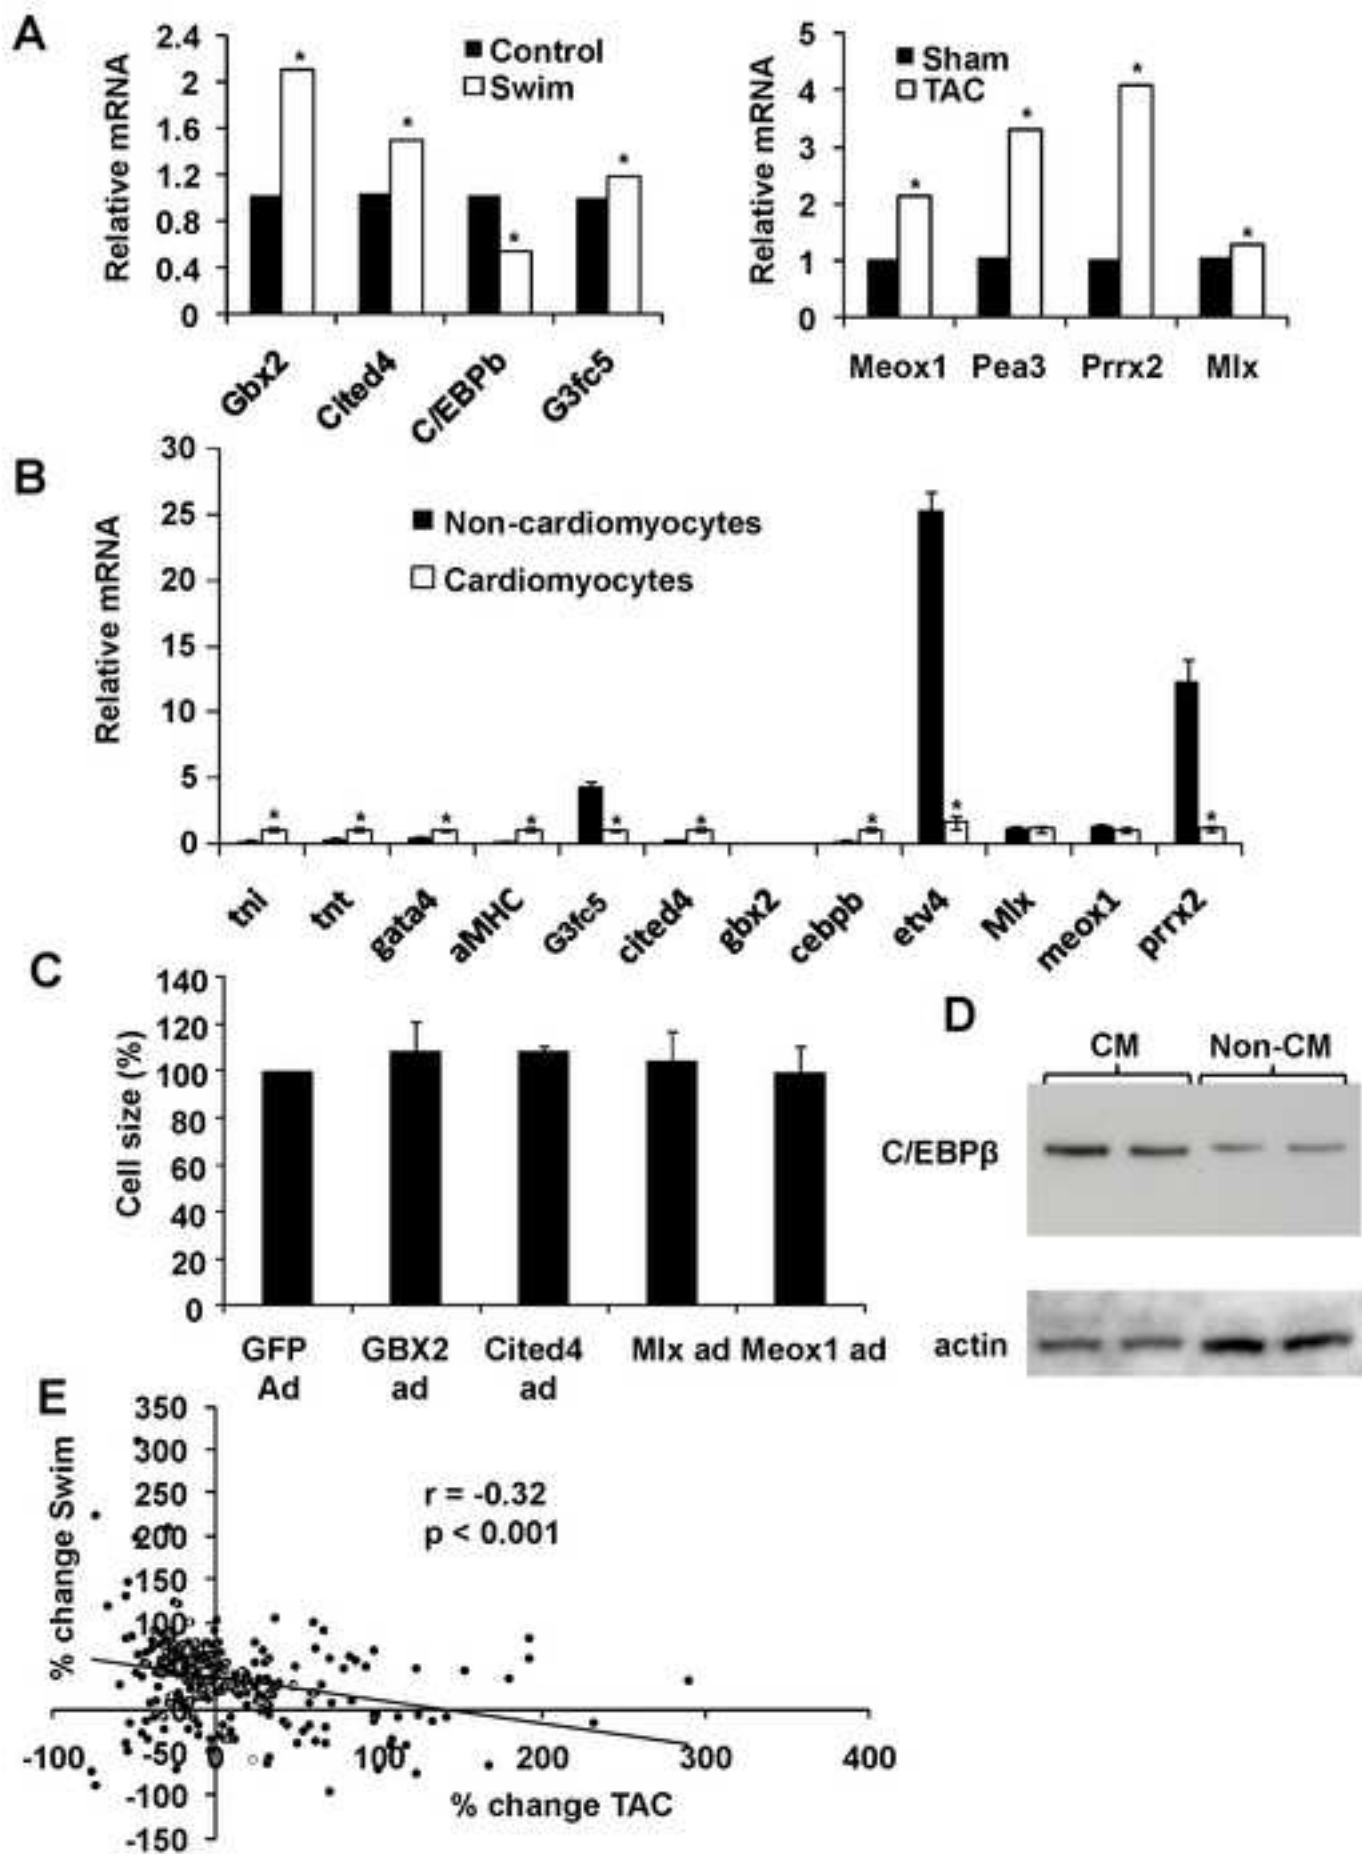

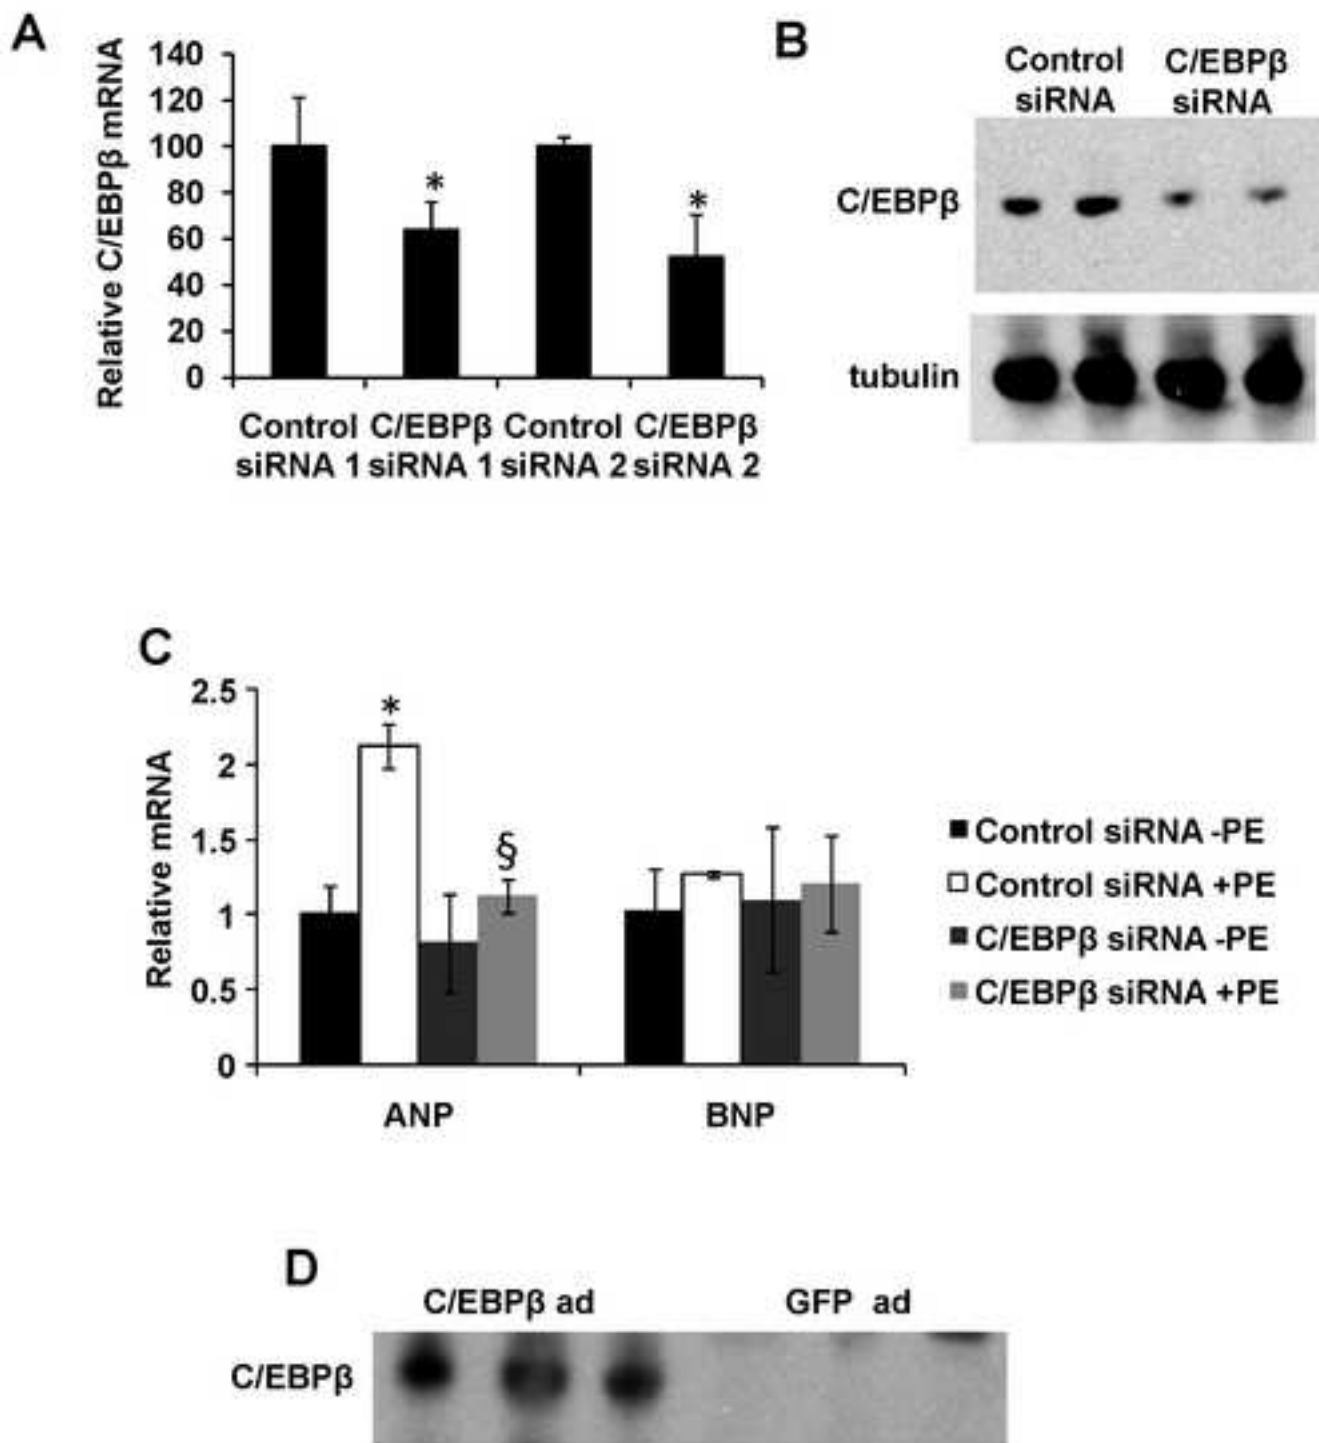



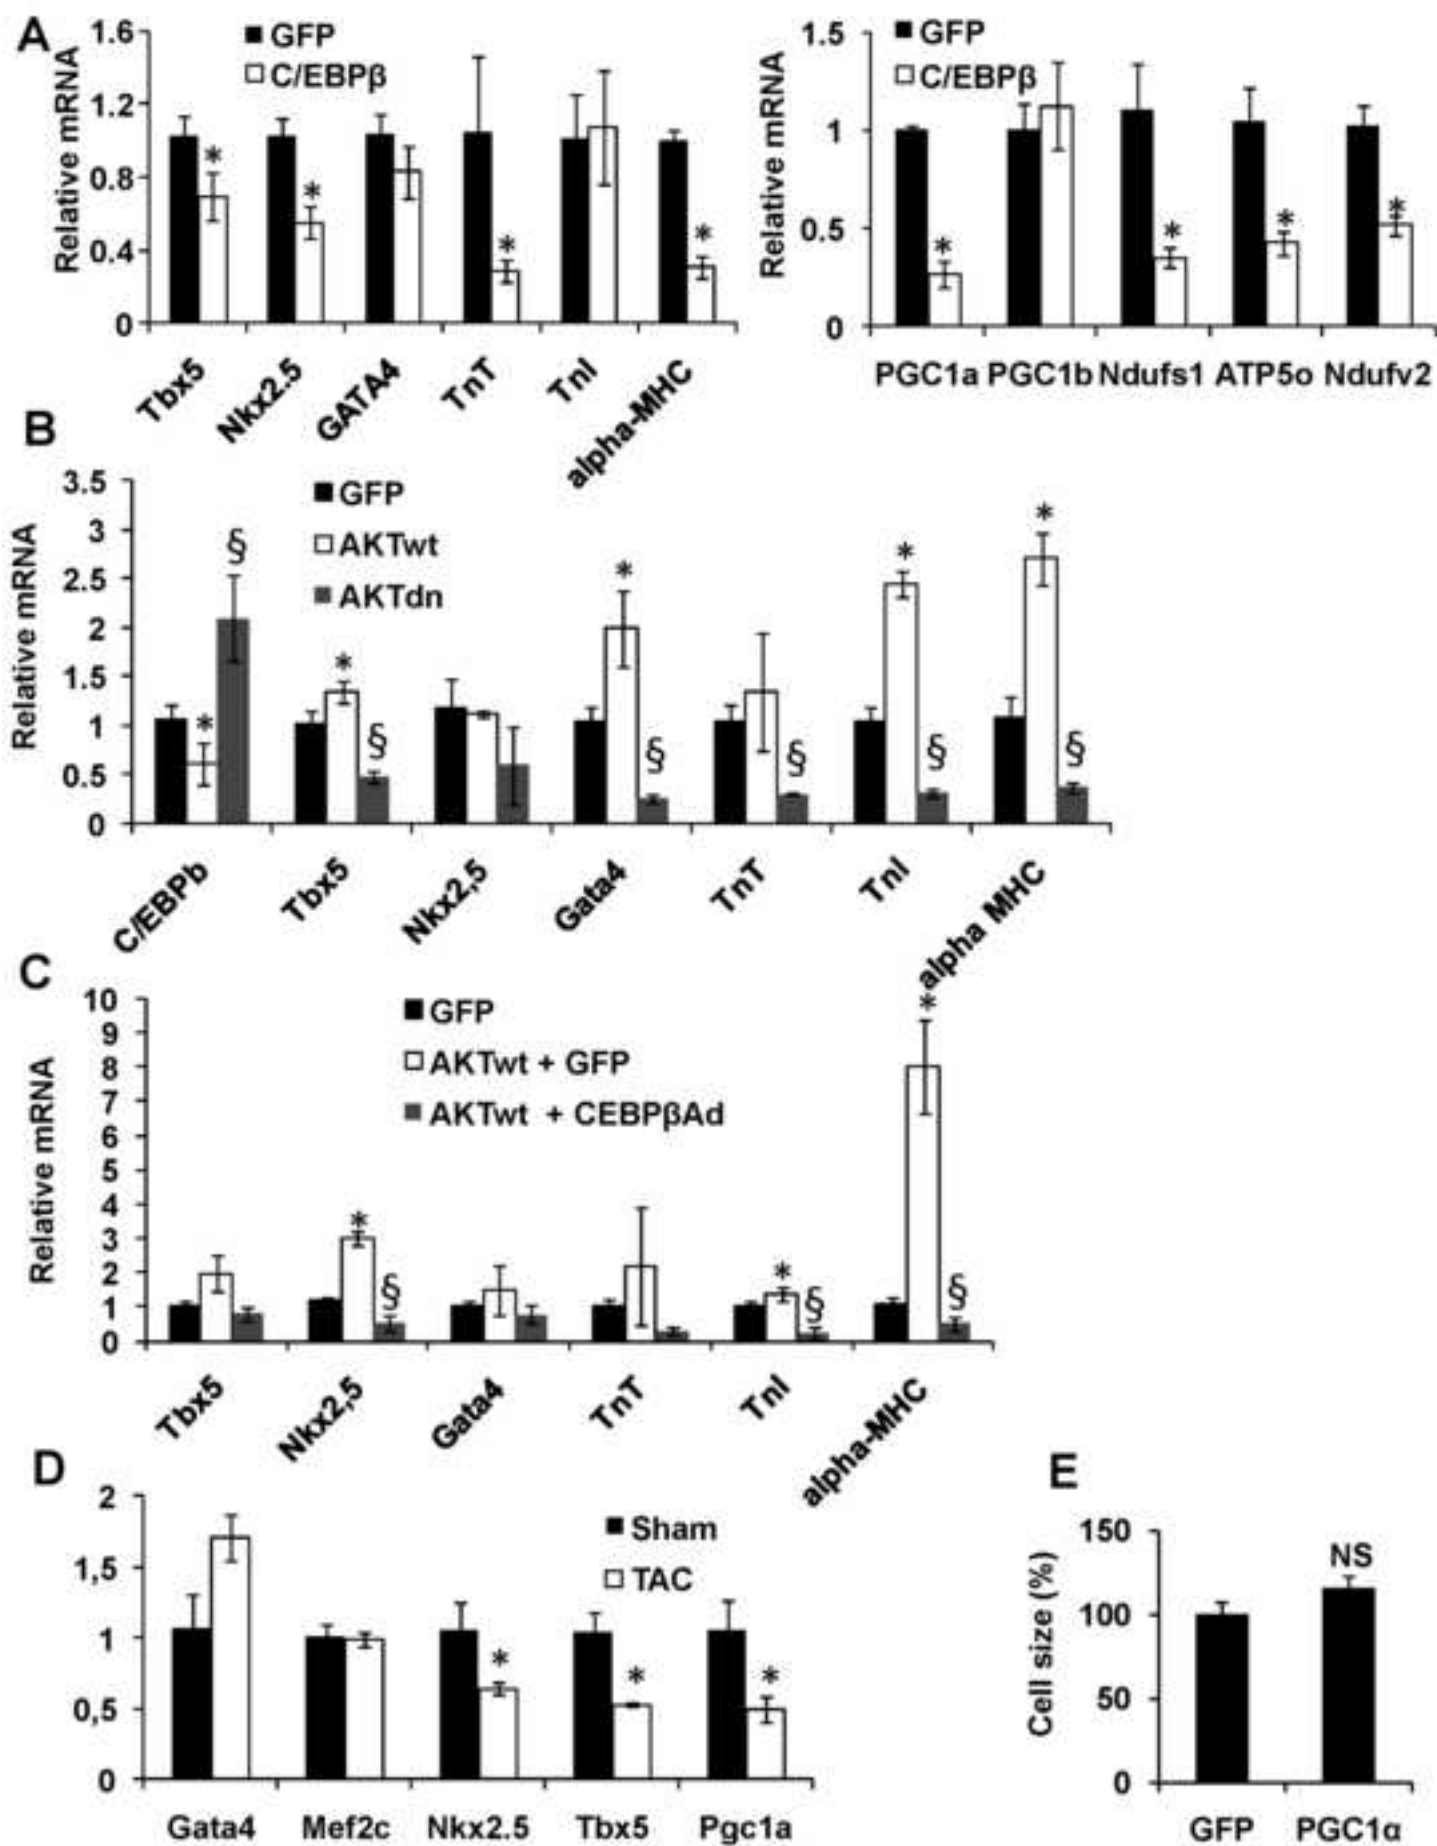

Supplemental figure IV

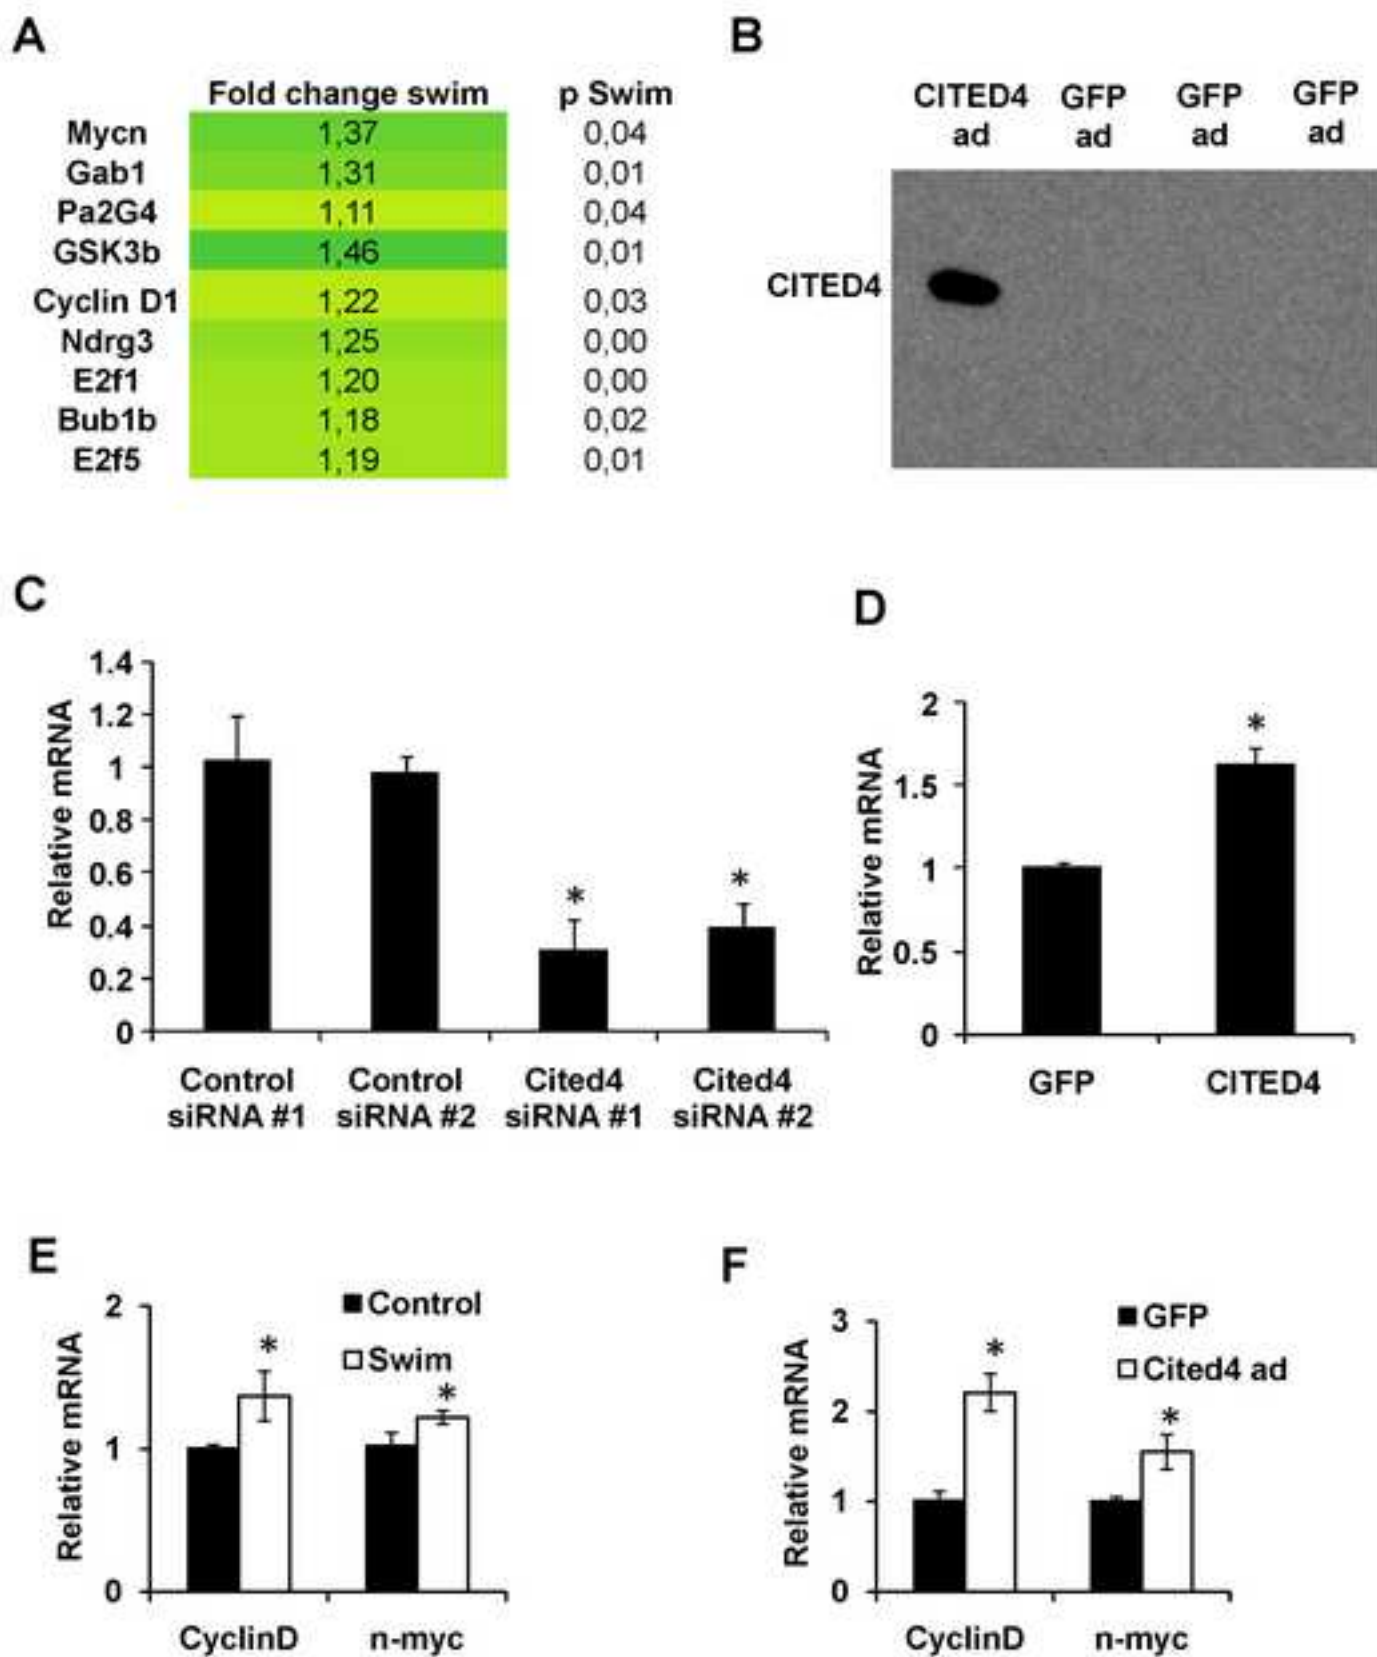

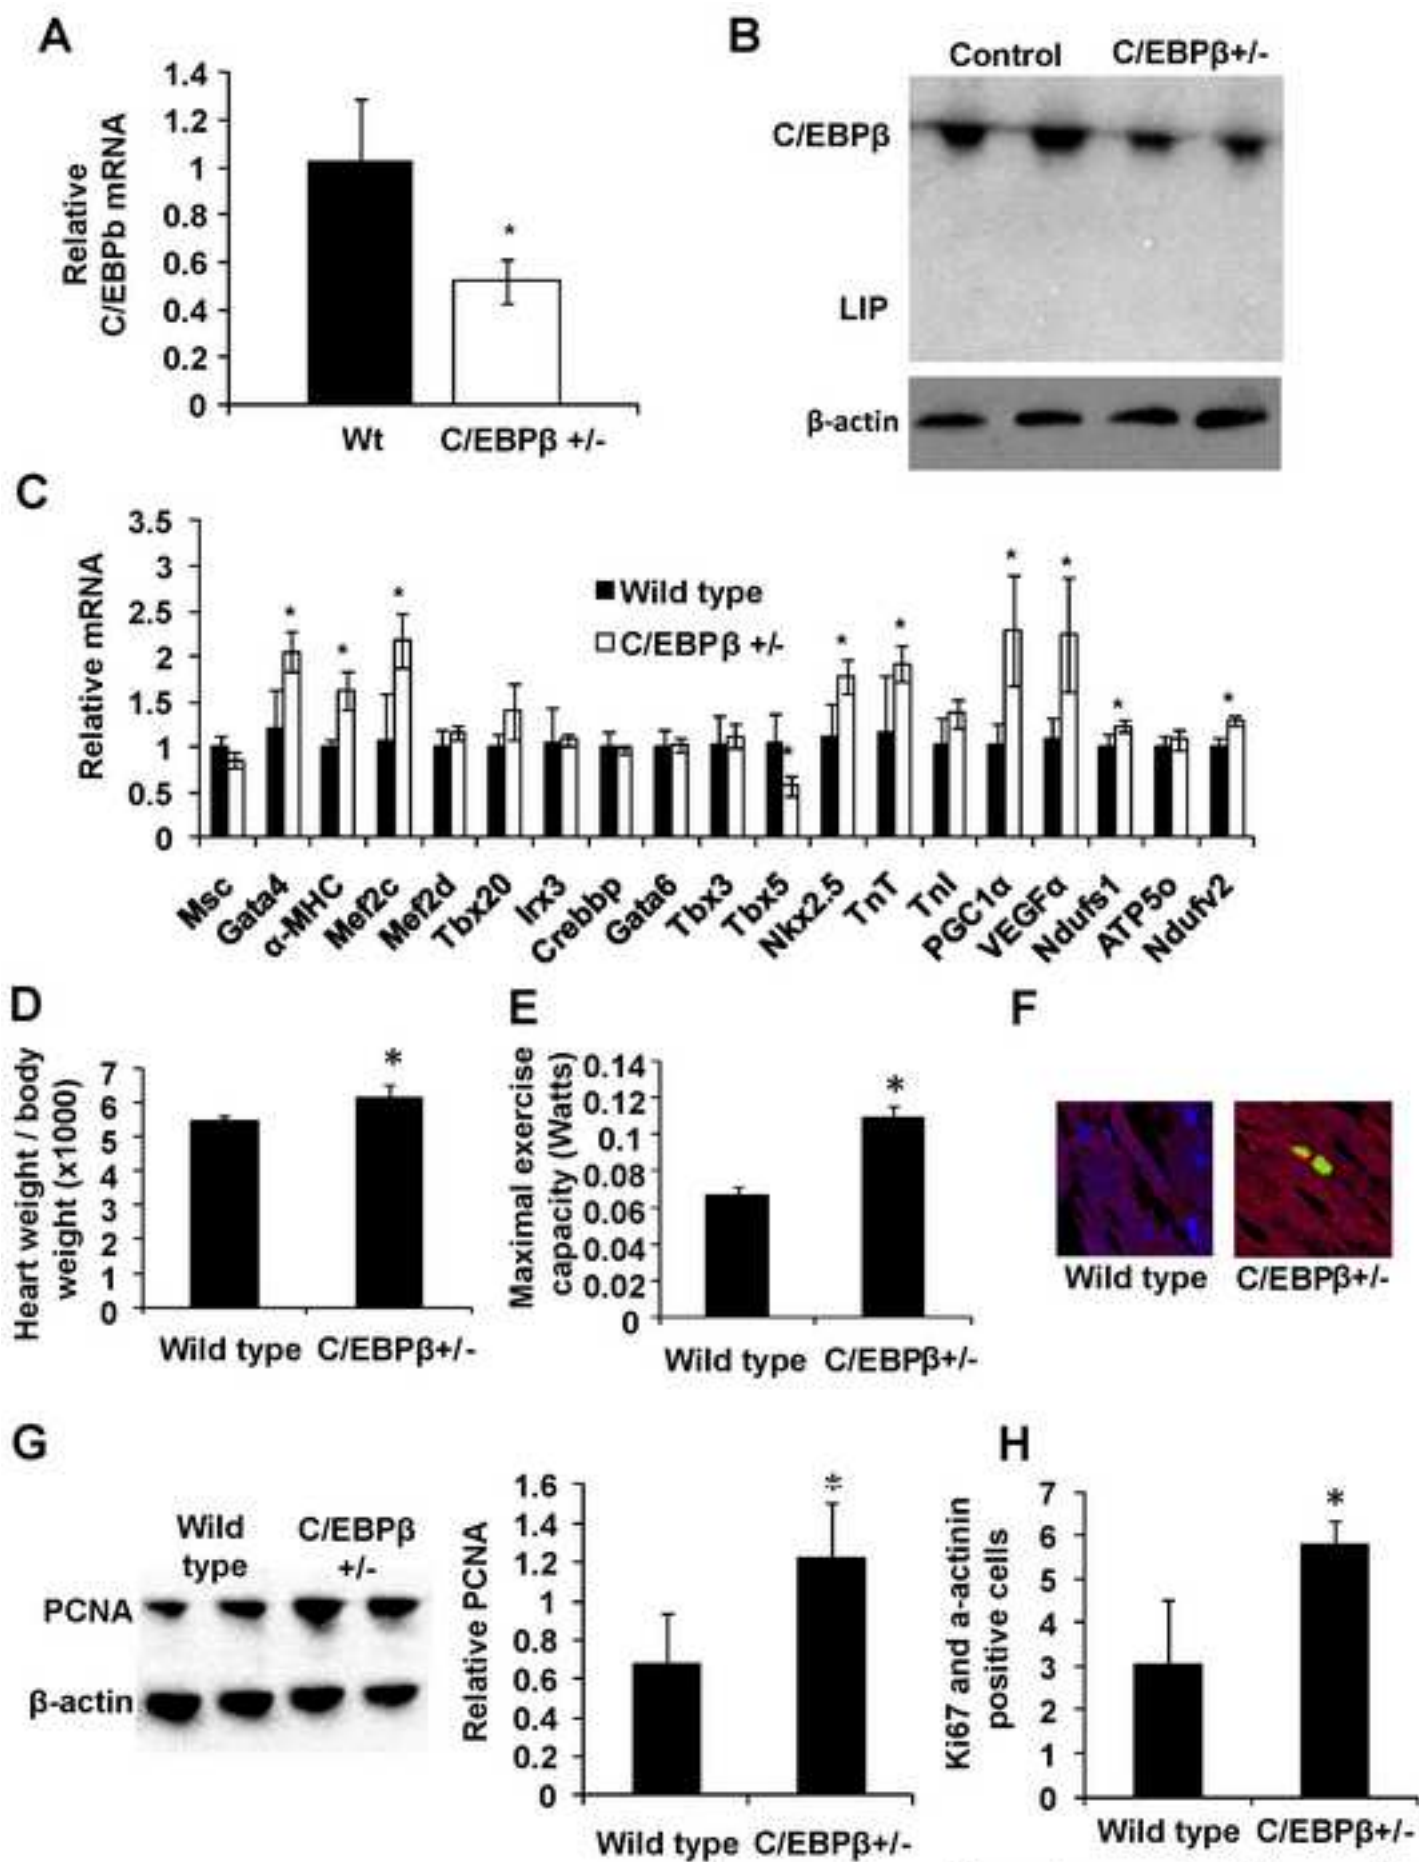

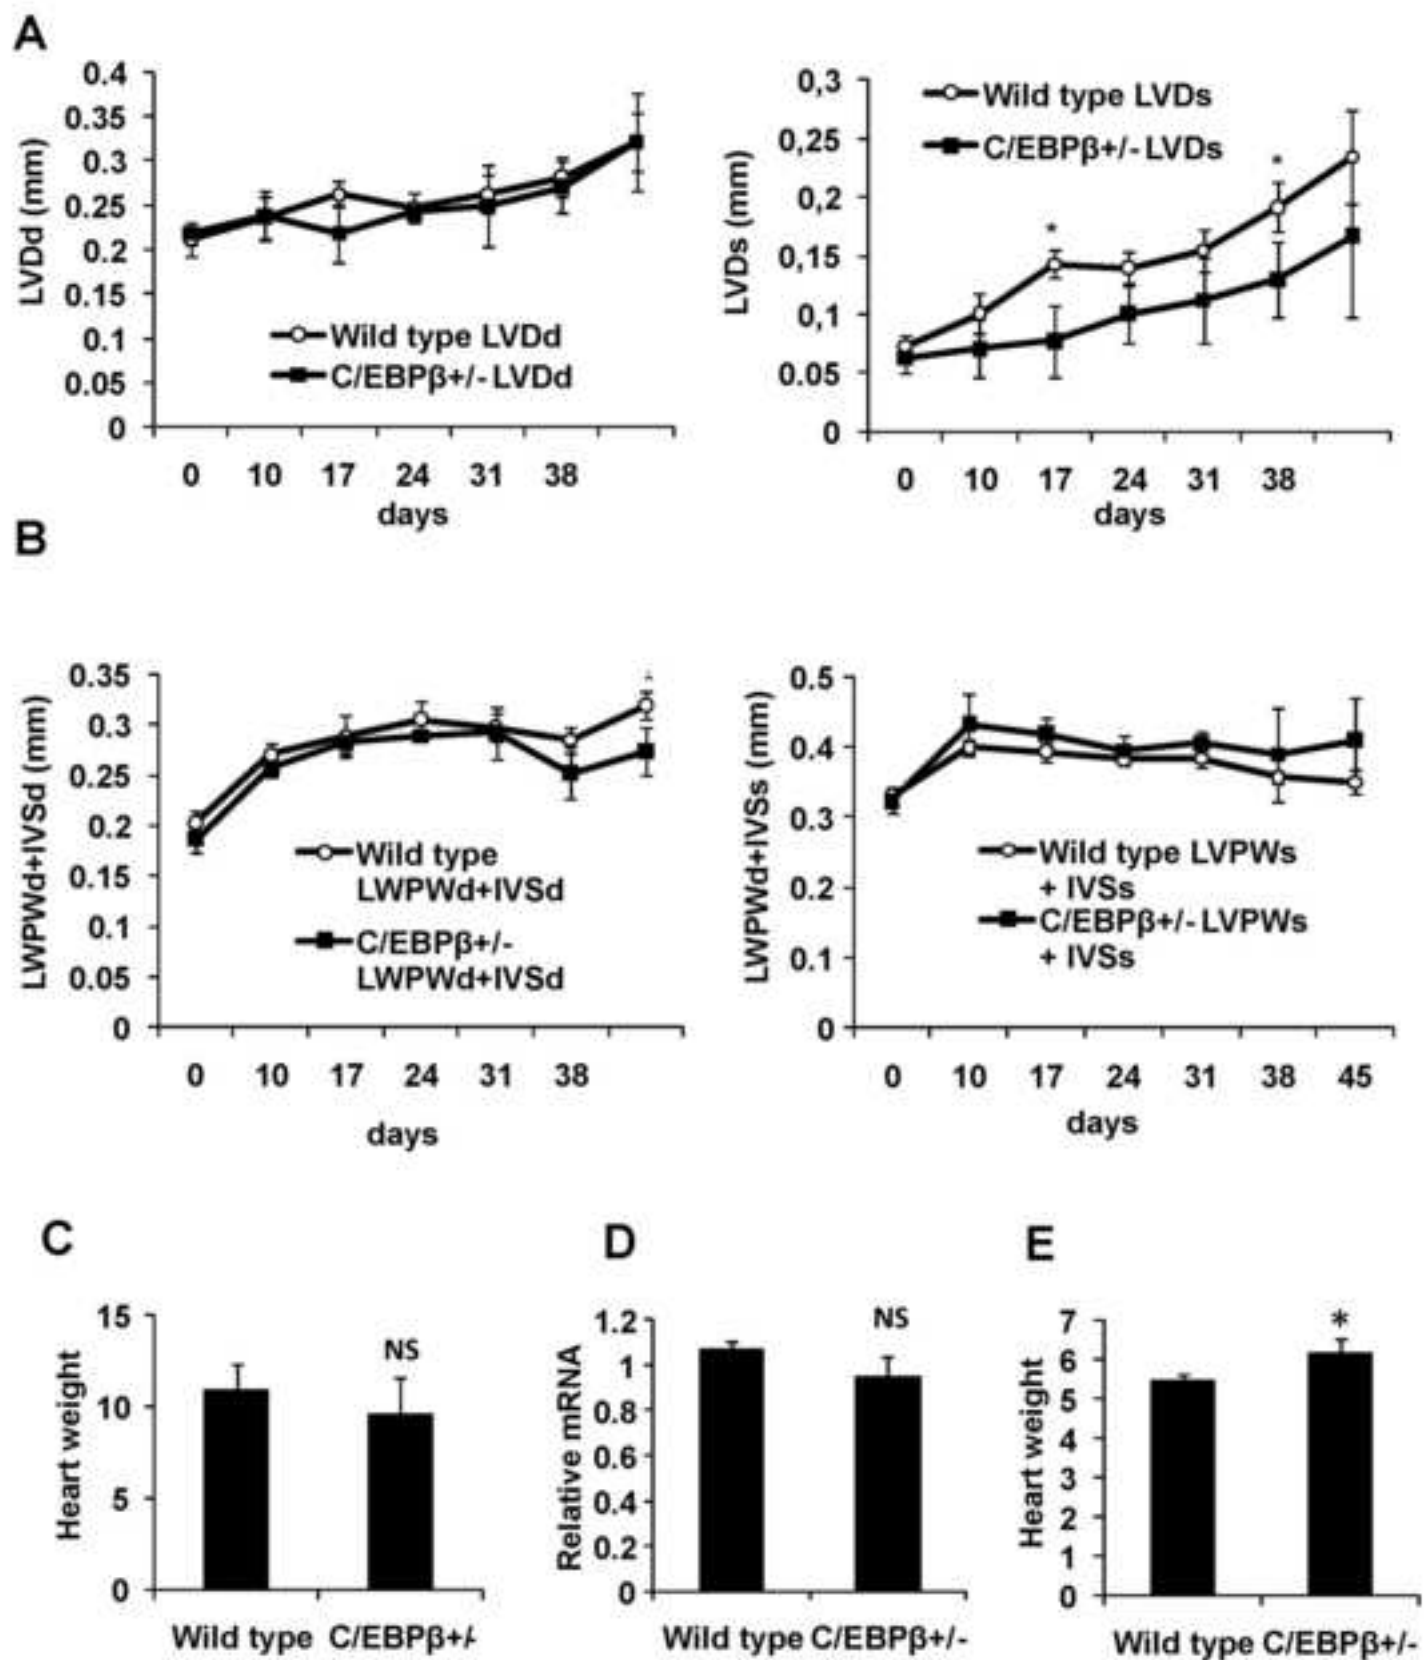

Supplement: NIHMS256479-supplement-01.pdf [file NIHMS256479-supplement-01.pdf]
